# Supplementary material
Source: publisher site journal article supplement (https://www.degruyterbrill.com/publication/isbn/9783110679854/downloadAsset/9783110679854_Fragebogen.docx)
Supplement: Supplementary file 1 [file 9783110679854_Fragebogen.docx]

| Wir laden alle deutschsprachigen Schriftstellerinnen und Schriftsteller dazu ein, ihre Angaben in "Kürschners Deutschem Literatur-Kalender"auf dem neuesten Stand zu halten. Der Eintrag ist selbstverständlich kostenlos und mit keiner weiteren Verpflichtung verbunden.  Der "Literatur-Kalender"verzeichnet die Verfasserinnen und Verfasser schöngeistiger Literatur, die sich der deutschen Sprache bedienen. Voraussetzung für die Aufnahme in dieses Nachschlagewerk ist die Veröffentlichung, das heißt die Vervielfältigung und Verbreitung eines literarischen Werks.  Das folgende Fragebogen-Formular können Sie benutzen, wenn Sie Angaben für einen Eintrag machen oder uns Änderungswünsche mitteilen möchten. Dies sind die notwendigen Schritte: |  |
| --- | --- |

Speichern Sie diese Fragebogendatei zunächst auf Ihrem Rechner ab.

Bearbeiten Sie die Datei mit dem Textverarbeitungssystem Ihrer Wahl und geben Sie Ihre
 Änderungen oder Ergänzungen in die jeweiligen Felder des Fragebogens ein.

Senden Sie eine E-Mail an **literatur-kuerschner@degruyter.com** und fügen Sie die
 von Ihnen bearbeitete Datei an.

Alternativ können Sie den Fragebogen auch ausdrucken, manuell ausfüllen, ggf. gesonderte
 Blätter mit zusätzlichen Angaben hinzufügen und an die Redaktion zurückschicken.

Antworten Sie per Fax an folgende Nummer: +49 (0) 30 26005 -123

oder mit der Post an die folgende Adresse:

Walter De Gruyter GmbH

KÜRSCHNERS DEUTSCHER LITERATUR-KALENDER

Rosenheimer Str. 143

81671 München

DEUTSCHLAND

Wenn Sie Fragen haben sollten, schreiben Sie an:
literatur-kuerschner@degruyter.com Das Redaktionsteam gibt gerne Auskunft.

Bitte beachten Sie: **Einsendeschluss ist der 20. Juni 2020**.

Herzlichen Dank für Ihre Unterstützung!

| **KORRESPONDENZADRESSE** |
| --- |
| **Die folgenden Angaben sollen nicht veröffentlicht, sondern nur für die Korrespondenz mit dem Verlag DE GRUYTER verwendet werden.** |
| **Eintrags-Nummer** – falls bekannt aus früherer Korrespondenz |
|  |
| **Straße, Hausnummer, PLZ, Ort, Land** |
|  |
| **Telefon** |
|  |
| **Der Fragebogen zu *Kürschners* *Deutschem Literatur-Kalender* soll künftig  elektronisch an diese E-Mail-Adresse geschickt werden:** |
|  |
| Ich bin damit einverstanden, dass DE GRUYTER meine E-Mail-Adresse für den Fragebogenversand auf gesicherten Servern speichert. Der Verlag wird die Daten vertraulich behandeln und nicht an Dritte weitergeben oder für Werbezwecke nutzen. |
|  |

| **IHR EINTRAG Die folgenden Angaben sollen veröffentlicht werden** |
| --- |
|  |
| **Name, unter dem der Eintrag verzeichnet ist** (Familienname, Vorname) |
|  |
| **Weitere Namensformen**  (Pseudonyme, eigentlicher Name, Geburtsname) |
|  |
| **Freitext Wirkungsort** (alternativ oder ergänzend zu Adressangaben, z.B. „lebt in Berlin“) |
|  |
| **Verlagsangabe(n)** Verlage, mit denen Sie zusammenarbeiten (maximal zwei Nennungen, alternativ zur Angabe der eigenen Adresse: Verlagsname, Ort) |
|  |

| **HAUPTANSCHRIFT** |
| --- |
| **Straße, Hausnummer, PLZ, Ort, Land** (ggf. zusätzlich **Postfach, PLZ, Ort, Land)** |
|  |
| **Telefon / Fax** |
|  |
| **E-Mail-Adresse / Homepage** |
|  |

| **ZWEITANSCHRIFT**  (Optional) |
| --- |
| **Straße, Hausnummer, PLZ, Ort, Land** (ggf. zusätzlich **Postfach, PLZ, Ort, Land)** |
|  |
| **Telefon / Fax** |
|  |
| **E-Mail-Adresse / Homepage** |
|  |

| **BIOGRAPHISCHES** |
| --- |
| **Geburtsdatum** (Geburtsjahr) **/ Geburtsort** |
|  |
| **Akademische Titel, Beruf(e) / Tätigkeiten** |
|  |
| **Mitgliedschaft(en) in schriftstellerischen Fachverbänden und literarischen Vereinigungen** (mit Eintrittsjahr und ggf. Austrittsjahr) |
|  |
| **Preise, Auszeichnungen, Stipendien** |
|  |
| **Literarische Arbeitsgebiete** (Roman, Lyrik, Erzählung, Dramatik, Hörspiel, Fernsehspiel etc.) |
|  |
| **Übersetzersprachen** (Sprachen, aus denen oder in die Sie literarische Texte übersetzen) |
|  |

| **BIBLIOGRAPHISCHE ANGABEN** |
| --- |
| **Bücher, Zeitschriften und andere Veröffentlichungen** (E-Book, Tonkassette, Schallplatte, CD, Video, DVD, CD-ROM) müssen erschienen sein und über die üblichen Vertriebswege der Öffentlichkeit zur Verfügung stehen bzw. gestanden haben (gegenwärtige Lieferbarkeit der Titel spielt dabei keine Rolle).  Werke, die in unveränderter Form in verschiedenen Medienvarianten erschienen sind (z.B. gedruckt und als E-Book) sollen nicht mehrfach aufgeführt werden.  **Bühnenstücke, Filmwerke, Fernsehfilme und Hörfunkstücke** müssen (sofern nicht gedruckt) uraufgeführt bzw. gesendet worden sein.  Ergänzen Sie die Bibliographie bitte auch um jene Titel, die *definitiv* noch in den Jahren **2020 und 2021** erscheinen werden.  **Zu nennen sind jeweils:**  **Titel** • **Jahr der ersten** **Auflage bzw. Uraufführung / Ursendung** • **Jahr der bisher letzten Auflage** • **Übersetzungen** in andere Sprachen (Angaben wie „3., erw.Aufl.“ oder „Tb.“ sind möglich)• **Literaturgattung** (Roman, Lyrik, Erzählung, Hörspiel, Fernsehfilm usw.) |
| **V: Verfasste Bücher und Uraufführungen von Bühnenstücken** Sie sind alleinige Autorin / alleiniger Autor.  Ein Eintrag in dieser Rubrik oder bei MV ist eine wesentliche Voraussetzung für die Aufnahme in den Kürschner. |
|  |

| **MV: Mitverfasste Bücher** Sie sind als Mitverfasserin / Mitverfasser genannt (bis zu drei Autorinnen / Autoren). Bitte führen Sie auch die anderen Mitverfasserinnen / Mitverfasser auf. Beiträge in Anthologien werden unter MA aufgeführt. |
| --- |
|  |
| **B: Bearbeitete Bücher** Sie haben bereits vorliegende Werke anderer Autorinnen oder Autoren bearbeitet und sind bibliographisch nicht als Verfasser oder Mitverfasser, sondern als Bearbeiter o.ä. aufgeführt. Bitte geben Sie den Namen der Autorin / des Autors mit an. |
|  |

| **MA: Mitarbeit an Büchern oder Zeitschriften** Veröffentlichungen in Anthologien, Jahrbüchern, Sammelbänden u.ä. sowie Zeitschriften. Bitte geben Sie nur die Buch- oder Zeitschriftentitel an (inkl. Jahrgangs- und Heftzählung), nicht aber die Titel Ihrer Beiträge. Zudem bitten wir Sie, die Menge der angegebenen Mitarbeiten ggf. einzugrenzen bzw. summarisch zu behandeln (z.B. „zahlr. Beitr. in Lit.-Zss. seit 1986, u.a. in: Das Gedicht; Hundspost.“). |
| --- |
|  |
| **H: Herausgegebene Bücher und Zeitschriften** Sie sind alleinige Herausgeberin / alleiniger Herausgeber.  Bitte geben Sie ggf. den / die Namen der Autorinnen / Autoren des von Ihnen herausgegebenen Werkes mit an. |
|  |
| **MH: Mitherausgegebene Bücher und Zeitschriften** Sie sind als Mitherausgeberin / Mitherausgeber genannt.  Bitte führen Sie auch die anderen Mitherausgeberinnen / Mitherausgeber auf und geben sie ggf. den / die Namen der  Autorinnen / Autoren des von Ihnen mitherausgegebenen Werkes an. |
|  |

| **F: Filmwerke** keine Fernsehsendungen |
| --- |
|  |
| **R: Fernseh- und Radioarbeiten, Hörspiel, Fernsehspiel u.ä.** Wiederholungen werden nicht angegeben |
|  |
| **P: Publikationen in anderer Form** Tonkassette, Schallplatte, CD, Video, DVD, CD-ROM usw. |
|  |

| **Ue: Übersetzungen oder Übertragungen belletristischer Werke ins Deutsche** bitte mit Angabe des Verfassernamens |
| --- |
|  |
| **MUe: Mitübersetzungen oder Mitübertragungen belletristischer Werke ins Deutsche** bitte mit Angabe der Mitübersetzerinnen /-übersetzer und des Verfassernamens |
|  |

| **Lit: Literatur über Sie** Grundlegende Veröffentlichungen über Sie (keine Rezensionen in lokalen Tageszeitungen), weiterführende und / oder bibliographische Sekundärliteratur mit Angabe des Verfassernamens. Bitte geben Sie auch bei Zeitschriftenartikeln, Artikeln in Lexika oder Sammelwerken möglichst den Verfasser, nicht aber den Titel des Beitrages an (Bsp.: G. Müller in: Lex. Dt. Literatur 98). |
| --- |
|  |
| **Möchten Sie der Redaktion etwas mitteilen oder auf etwas hinweisen?** |
|  |
